# Supplementary material for: A systematic review of climate change science relevant to Australian design flood estimation
Source: Copernicus journal article supplement (doi:10.5194/hess-2023-232), 2023-10-10
Supplement: Supplementary file 2 [file supplementary_table.xlsx]

## Sheet: data
Reference	Category	Period	Dataset	Scenario	Warming over reported change (K)	Duration	Value	Region	Type of change	Season	Centre statistic	Centre change (%)	Change/degree (%/K)	Min change (%)	Min change/ degree (%/K)	Max change (%)	Max change/ degree (%/K)	Uncertainty statement	Location of change information	Notes	Disqualifying features description
Chevuturi, A., Klingaman, N.P., Turner, A.G., Hannah, S.	GCM	+1.2C vs 2006-2015	HAPPI	+1.2C	1.2	Daily	P99.9	Australia	Intensity	DJF	Mean	5.43	4.5	3.33	2.8	7.5	6.3		Fig 9	Change and range estimated from Fig 9 for AUS and using Plus-2.0 minus All-Hist. Took mean over all models, where individual values are ensemble means per model	DJF only
Herath, S.M., Sarukkalige, P.R., Nguyen, V.T.V.	GCM	2011-2040 vs 2071-2100	HadCM3, CGCM3	A2	3	Hourly	1 in 10	Perth	Intensity	All	Mean	-8.35	-2.8	-9.9	-3.3	-6.8	-2.3	Decrease of -6.5 to -10.8% across the IFD curve	Table 4		Don't include GCM hourly in plot
Herath, S.M., Sarukkalige, P.R., Nguyen, V.T.V.	GCM	2011-2040 vs 2071-2100	HadCM3, CGCM3	A2	3	Hourly	1 in 100	Perth	Intensity	All	Mean	-8.65	-2.9	-10.8	-3.6	-6.5	-2.2	Decrease of -6.5 to -10.8% across the IFD curve	Table 4		Don't include GCM hourly in plot
Osburn, L., Hope, P., Dowdy, A.	Trend	1958-1985 vs 1987-2014	Stations		0.48	Hourly	1 in 1 (>12mm/h)	Victoria	Frequency	All	Mean	26.2	54.1					p=0.058	Pg 5	Ranges not given	Frequency, not intensity
Osburn, L., Hope, P., Dowdy, A.	Trend	1958-1985 vs 1987-2014	Stations		0.48	Hourly	1 in 2 (>18 mm/h)	Victoria	Frequency	All	Mean	89	183.9					p<0.01	Pg 5	Ranges not given	Frequency, not intensity
Pepler, A.S., Dowdy, A.J.	RCM	1980-2009 vs 2070-2099	CMIP5-RCM	RCP8.5	1	Daily	Rx1D	Australia	Frequency	All	Mean	4	4	-6.4	-6.4	8.8	8.8	67% >0	Fig 9b, pg 7804		Frequency, not intensity
Pepler, A.S., Dowdy, A.J.	RCM	1980-2009 vs 2070-2099	CMIP5-RCM	RCP8.5	1	Daily	Rx1D	ESB	Frequency	All	Mean	5	5	-18	-18	18	18	90% >0	Fig 9b, pg 7804	Mean of Fig 9b points for ESB estimated as 0.025	Frequency, not intensity
Pepler, A.S., Dowdy, A.J.	RCM	1980-2009 vs 2070-2099	CMIP5-RCM	RCP8.5	1	Daily	Rx1D	Tasmania	Frequency	All	Mean	12	12	-3.2	-3.2	28.8	28.8	90% >0	Fig 9b, pg 7804	Mean of Fig 9b points for ESB estimated as 0.075	Frequency, not intensity
Kamruzzaman, M., Beecham, S., Metcalfe, A.V.	Trend	1977-2005	Stations			6 min to 24 h	Monthly max	Adelaide	Intensity	All											No trend found
Dey, R., Lewis, S.C., Arblaster, J.M., Abram, N.J.	Trend	1951-2015	GHCNDEX			Daily	P99	Australia	Intensity	All											No trend found
Fu, G., Chiew, F.H.S., Post, D.A.	Trend	1971-2021	AGCD			Daily	Rx1D	Victoria	Intensity	All											No trend found
Bao, J., Sherwood, S.C., Alexander, L.V., Evans, J.P.	RCM	1990-2009 vs 2060-2079	NARCliM	SRES A2	1	Daily	1 in rage > P99.5 (~twice/y)	Australia	Intensity	All	Mean	6.5	6.5	2	2	11.2	11.2		Supp Table 2
Roderick, T.P., Wasko, C., Sharma, A.	Scaling	2002-2015	Stations		1	Daily	P90	Australia	Intensity	All	Median	7.2	7.2	-5	-5	28	28	107/109>=0	Pg 5, Fig 1	Dewpoint scaling
Li, J., Wasko, C., Johnson, F., Evans, J.P., Sharma, A.	Scaling	1990-2009	NCEP-NARCLiM 2km		1	Hourly	P90	Sydney	Intensity	All	Median	2	2	-2	-2	7	7		Fig 5	Dry-bulb temperature
Li, J., Wasko, C., Johnson, F., Evans, J.P., Sharma, A.	Scaling	1990-2009	NCEP-NARCLiM 10km		1	Hourly	P90	Sydney	Intensity	All	Median	4	4	0	0	7	7	Majority >1%/K	Fig 5	Dry-bulb temperature
Li, J., Wasko, C., Johnson, F., Evans, J.P., Sharma, A.	Scaling		Stations		1	Hourly	P90	Sydney	Intensity	All	Median	4	4	-1	-1	9	9		Fig 5	Dry-bulb temperature
Ayat, H., Evans, J.P., Sherwood, S.C., Soderholm, J.	Trend	1999-2017	Radar		0.02	Object	P95	Sydney	Intensity	All	NA	2	85.5	2	85.5	4.5	192.4	Consistent increases across all radars	Fig 2	Stronger trend for shorter period; stronger trends for objects matched across radars. Here reporting trend from longest radar timeseries
Magan, B., Kim, S., Wasko, C., Barbero, R., Moron, V., Nathan, R., Sharma, A.	Scaling		Stations		1	Daily	P95	Northern Australia	Intensity	All	Median	9	9	6.9	6.9	13	13	Uncertainty range excludes 0, except for the Top End	Fig 2	Varies by weather type, but all are > 7%. Scaling with dew-point temperature
Bui, A., Johnson, F., Wasko, C.	Scaling		Stations		1	Daily	P95	Australia	Intensity	All	Median	7	7	2	2	20	20	All but one station are stat sig, most > 6% (Figure 2).	Fig 4	Results using dewpoint temperature in 0-2.5 km geopotential range. Scaling and range from Fig. 4. Uses temp at various heights, both temp & dewpoint
Shields, C.A., Kiehl, J.T., Meehl, G.A.	RCM	1986-2005 vs 2081-2100	3xCCSM4 0.5 deg	RCP8.5	3.84	Daily	P95	Aust/NZ region	Intensity	All	Mean	1	0.3	-2	-0.5	3	0.8		Fig 15	Large-scale-only. 0.5 deg global ensemble members. Temp change estimated using full CMIP5 ensemble. Assume Fig 15 shows mean since Fig 14 shows averages
Shields, C.A., Kiehl, J.T., Meehl, G.A.	RCM	1986-2005 vs 2081-2100	3xCCSM4 0.5 deg	RCP8.5	3.84	Daily	P95	Aust/NZ region	Intensity	All	Mean	12.5	3.3	11	2.9	15	3.9		Fig 15	Convective only. 0.5 deg global ensemble members. Temp change estimated using full CMIP5 ensemble. Assume Fig 15 shows mean since Fig 14 shows averages
Visser, J.B., Wasko, C., Sharma, A., Nathan, R.	Scaling		Stations		1	6 h	P95 1h peak	Australia	Intensity	All	Mean	8.39	8.4	5	5	20	20	Higher for tropics (~14%)	Fig. 9.	Dry-bulb temperature
Visser, J.B., Wasko, C., Sharma, A., Nathan, R.	Scaling		Stations		1	Hourly	P95 1h peak	Australia	Intensity	All	Mean	8.33	8.3	5	5	19	19	Higher for tropics (~14%), lower for arid areas	Fig. 9.	Dry-bulb temperature
Visser, J.B., Wasko, C., Sharma, A., Nathan, R.	Scaling		Stations		1	18 h	P95 1h peak	Australia	Intensity	All	Mean	6.78	6.8	3	3	17	17	Higher for tropics (~10%)	Fig. 9.	Dry-bulb temperature
Ayat, H., Evans, J.P., Sherwood, S.C., Soderholm, J.	Trend	1999-2017	Radar		0.02	Hourly	P99	Sydney	Intensity	All	Mean	0.86	36.6	0.3	12.8	3.35	143.2	88% sig increase	Fig 3	Stronger but less robust for P99.9
Ayat, H., Evans, J.P., Sherwood, S.C., Soderholm, J.	Trend	1999-2017	Stations		0.02	Hourly	P99	Sydney	Intensity	All	Mean	0.71	30.2	0	0	2	85.5	66% sig increase	Fig 3	Stronger but less robust for P99.9
Coppola, E., et al.	GCM	1995-2014 vs 2080-2099	CMIP5	RCP8.5	3.66	Daily	P99	Central Australia	Intensity	All	Mean	-7.3	-2	-43	-11.7	13	3.6	Not robust	Table 5, Fig 12	Strongest in north and south. Range is 5-95 percentile estimated from Fig 12
Coppola, E., et al.	GCM	1995-2014 vs 2080-2099	CMIP6	SSP5-8.5	3.89	Daily	P99	Eastern Australia	Intensity	All	Mean	-0.87	-0.2	-22	-5.7	26	6.7	Not robust	Table 5, Fig 12	Strongest in north and south. Range is 5-95 percentile estimated from Fig 12
Coppola, E., et al.	GCM	1995-2014 vs 2080-2099	CMIP6	SSP5-8.5	3.89	Daily	P99	Central Australia	Intensity	All	Mean	-0.29	-0.1	-20	-5.1	18	4.6	Not robust	Table 5, Fig 12	Strongest in north and south. Range is 5-95 percentile estimated from Fig 12
Coppola, E., et al.	GCM	1995-2014 vs 2080-2099	CMIP5	RCP8.5	3.66	Daily	P99	Eastern Australia	Intensity	All	Mean	0.4	0.1	-12	-3.3	17	4.6	Not robust	Table 5, Fig 12	Strongest in north and south. Range is 5-95 percentile estimated from Fig 12.
Coppola, E., et al.	GCM	1995-2014 vs 2080-2099	CMIP5	RCP8.5	3.66	Daily	P99	Southern Australia	Intensity	All	Mean	0.61	0.2	-23	-6.3	13	3.6	Not robust	Table 5, Fig 12	Strongest in north and south. Range is 5-95 percentile estimated from Fig 12.
Coppola, E., et al.	GCM	1995-2014 vs 2080-2099	CMIP5	RCP8.5	3.66	Daily	P99	Northern Australia	Intensity	All	Mean	1.29	0.4	-29.5	-8.1	18	4.9	Not robust	Table 5, Fig 12	Strongest in north and south. Range is 5-95 percentile estimated from Fig 12
Coppola, E., et al.	GCM	1995-2014 vs 2080-2099	CMIP6	SSP5-8.5	3.89	Daily	P99	Southern Australia	Intensity	All	Mean	1.87	0.5	-5	-1.3	15	3.9	Not robust	Table 5, Fig 12	Strongest in north and south. Range is 5-95 percentile estimated from Fig 12
Coppola, E., et al.	GCM	1995-2014 vs 2080-2099	CMIP6	SSP5-8.5	3.89	Daily	P99	Northern Australia	Intensity	All	Mean	7.42	1.9	2	0.5	15	3.9	Not robust	Table 5, Fig 12	Strongest in north and south. Range is 5-95 percentile estimated from Fig 12
Coppola, E., et al.	RCM	1995-2014 vs 2080-2099	CORDEX-0.44	RCP8.5	3.66	Daily	P99	Eastern Australia	Intensity	All	Mean	-9.66	-2.6	-11	-3	-9	-2.5	Not robust	Table 5, Fig 12	Strongest in north and south. Range is 5-95 percentile estimated from Fig 12
Coppola, E., et al.	RCM	1995-2014 vs 2080-2099	CORDEX-0.44	RCP8.5	3.66	Daily	P99	Central Australia	Intensity	All	Mean	-3.12	-0.9	-5	-1.4	-1	-0.3	Not robust	Table 5, Fig 12	Strongest in north and south. Range is 5-95 percentile estimated from Fig 12
Coppola, E., et al.	RCM	1995-2014 vs 2080-2099	CORDEX-0.44	RCP8.5	3.66	Daily	P99	Southern Australia	Intensity	All	Mean	-0.36	-0.1	-1	-0.3	1	0.3	Not robust	Table 5, Fig 12	Strongest in north and south. Range is 5-95 percentile estimated from Fig 12
Coppola, E., et al.	RCM	1995-2014 vs 2080-2099	CORDEX-0.44	RCP8.5	3.66	Daily	P99	Northern Australia	Intensity	All	Mean	-0.08	0	-1	-0.3	1	0.3	Not robust	Table 5, Fig 12	Strongest in north and south. Range is 5-95 percentile estimated from Fig 12
Coppola, E., et al.	RCM	1995-2014 vs 2080-2099	CORDEX-CORE	RCP8.5	3.66	Daily	P99	Southern Australia	Intensity	All	Mean	1.66	0.5	-9	-2.5	21	5.7	Not robust	Table 5, Fig 12	Strongest in north and south. Range is 5-95 percentile estimated from Fig 12
Coppola, E., et al.	RCM	1995-2014 vs 2080-2099	CORDEX-CORE	RCP8.5	3.66	Daily	P99	Eastern Australia	Intensity	All	Mean	2.23	0.6	-5	-1.4	19	5.2	Not robust	Table 5, Fig 12	Strongest in north and south. Range is 5-95 percentile estimated from Fig 12
Coppola, E., et al.	RCM	1995-2014 vs 2080-2099	CORDEX-CORE	RCP8.5	3.66	Daily	P99	Central Australia	Intensity	All	Mean	2.62	0.7	-11	-3	34	9.3	Not robust	Table 5, Fig 12	Strongest in north and south. Range is 5-95 percentile estimated from Fig 12
Coppola, E., et al.	RCM	1995-2014 vs 2080-2099	CORDEX-CORE	RCP8.5	3.66	Daily	P99	Northern Australia	Intensity	All	Mean	3.89	1.1	-10	-2.7	36.5	10	Not robust	Table 5, Fig 12	Strongest in north and south. Range is 5-95 percentile estimated from Fig 12
Watterson, I.G.	GCM	1986-2005 vs 2080-2099	CMIP5	RCP8.5	3.84	Daily	P99	Southern Australia	Intensity	DJF	Mean	10.8	2.8	5	1.3	20	5.2	+1% in SON, +6% JJA, +10% MAM.	Table 2, Table 3, Fig 8	Correlation across models 0.7 (Table 3)
Watterson, I.G.	GCM	1986-2005 vs 2080-2099	CMIP5	RCP8.5	3.84	Daily	P99	Northern Australia	Intensity	DJF	Mean	21.1	5.5	5	1.3	30	7.8	Negative trends in JJA and SON, when values small.	Table 2, Table 3, Fig 8	Correlation across models 0.47 (Table 3)
Zhang, W., Villarini, G., Wehner, M.	Scaling	1979-2017	ERAI		1	Daily	P99	Australia	Intensity	All	Mean	7.5	7.5	-7	-7	10	10	5-10%/K in north, weak,negative in south	Fig 4	Dewpoint scaling
Zhang, W., Villarini, G., Wehner, M.	Scaling	1979-2017	Stations		1	Daily	P99	Australia	Intensity	All	Mean	8.5	8.5	-5	-5	10	10		Fig 3	Dewpoint scaling. GSOD stations
Zhang, W., Villarini, G., Wehner, M.	Scaling	1979-2005	NCAR CAM5 0.5 deg.		1	Daily	P99	Australia	Intensity	All	Mean	20	20	10	10	20	20	Low variability across Australia.	Fig 5	Dewpoint scaling
Wasko, C., Lu, W.T., Mehrotra, R.	Scaling		Stations		1	Hourly	P99	Australia	Intensity	All	Median	9.7	9.7	-5	-5	25	25	Most of Australia at ~5-15%/K	Fig 4	Stations, vs dewpoint (drybulb also reported)
Wasko, C., Lu, W.T., Mehrotra, R.	Scaling		Stations		1	Daily	P99	Australia	Intensity	All	Median	8.1	8.1	-8	-8	25	25	Most of Australia at ~5-10%/K	Fig 4	Stations, vs dewpoint (drybulb also reported)
Ali, H., Fowler, H.J., Lenderink, G., Lewis, E., Pritchard, D.	Scaling	1979-2014	Stations		1	Hourly	P99	Australia	Intensity	All		8.5	8.5	3.5	3.5	14	14	88%>3.5%/K. Range 8.2-8.8% for different methods. Range includes 78% of stations		GSDR stations, vs dewpoint
Ali, H., Fowler, H.J., Lenderink, G., Lewis, E., Pritchard, D.	Scaling	1979-2014	Stations		1	Daily	P99	Australia	Intensity	All		7.3	7.3	3.5	3.5	14	14	89%>3.5%/K. +7.5%/K for another method. Giving the range that includes 79% of stations		GSDR stations, vs dewpoint
Ayat, H., Evans, J.P., Sherwood, S.C., Soderholm, J.	Trend	1999-2017	Stations		0.02	10 min	P99.9	Sydney	Intensity	All	Mean	0.66	28	0	0	1.95	83.4	66% sig increase	Fig 3	Weaker and less robust for P99. Converted based on linear trend of 0.02339C/y over 1999-2017
Ayat, H., Evans, J.P., Sherwood, S.C., Soderholm, J.	Trend	1999-2017	Radar		0.02	10 min	P99.9	Sydney	Intensity	All	Mean	1.43	61	1.1	47	3.5	149.6	100% sig increase	Fig 3	Weaker and less robust for P99. Converted based on linear trend of 0.02339C/y over 1999-2017
Evans, J.P., McCabe, M.F.	GCM	1985-2009 vs 2075-2099	CSIROMk3			Daily	P99TOT	SEA (3 subregions)	Total	All		19.65		20		35
Mantegna, G.A., White, C.J., Remenyi, T.A., Corney, S.P., Fox-Hughes, P.	RCM	1961-2009 vs 2070-2099	CMIP3-CCAM	2.9C increase	2.9	0.5 to 6 h	1 in 100	Hobart, Launceston	Intensity	All	Mean	89	30.7	57	19.7	122	42.1	Standard deviations given for each multi-model mean.	Table 4	Here showing mean of all multi-model means for 1% <= 6h AEPs	Old study (CMIP3-based), and just two stations
Yilmaz, A.G., Hossain, I., Perera, B.J.C.	Trend	1925-1966 vs 1967-2010	Stations		0.38	Hourly	1 in 10	Melbourne	Intensity	All	NA	2.91	7.7					Not significant	Table 3	Change and range for 1 h. No range	Old study (second period dominated by millenium drought) and just one station
Yilmaz, A.G., Hossain, I., Perera, B.J.C.	Trend	1925-1966 vs 1967-2010	Stations		0.38	2, 3, 6 h	1 in 10	Melbourne	Intensity	All	Mean	6.01	15.8	3.33	8.8	7.35	19.3	Not significant	Table 3	Change and range for 2 h, 3 h, 6 h	Old study (second period dominated by millenium drought) and just one station
Yilmaz, A.G., Hossain, I., Perera, B.J.C.	Trend	1925-1966 vs 1967-2010	Stations		0.38	6 min, 30 min	1 in 10	Melbourne	Intensity	All	Mean	6.05	15.9	5.7	15	6.4	16.9	Not significant	Table 3	Change and range for 6 min, 30 min	Old study (second period dominated by millenium drought) and just one station
Yilmaz, A.G., Hossain, I., Perera, B.J.C.	Trend	1925-1966 vs 1967-2010	Stations		0.38	Daily	1 in 10	Melbourne	Intensity	All	NA	-3.85	-10.1					Not significant	Table 3	Change for 24 h. No range	Old study (second period dominated by millenium drought) and just one station
Yilmaz, A.G., Hossain, I., Perera, B.J.C.	Trend	1925-1966 vs 1967-2010	Stations		0.38	Hourly	1 in 100	Melbourne	Intensity	All	NA	-13.57	-35.7					Not significant	Table 3	Change and range for 1 h. No range	Old study (second period dominated by millenium drought) and just one station
Yilmaz, A.G., Hossain, I., Perera, B.J.C.	Trend	1925-1966 vs 1967-2010	Stations		0.38	2, 3, 6 h	1 in 100	Melbourne	Intensity	All	Mean	3.26	8.6	-3.64	-9.6	10.71	28.2	Not significant	Table 3	Change and range for 2 h, 3 h, 6 h	Old study (second period dominated by millenium drought) and just one station
Yilmaz, A.G., Hossain, I., Perera, B.J.C.	Trend	1925-1966 vs 1967-2010	Stations		0.38	6 min, 30 min	1 in 100	Melbourne	Intensity	All	Mean	1.54	4	-23.21	-61.1	26.28	69.2	Not significant	Table 3	Change and range for 6 min, 30 min	Old study (second period dominated by millenium drought) and just one station
Yilmaz, A.G., Hossain, I., Perera, B.J.C.	Trend	1925-1966 vs 1967-2010	Stations		0.38	Daily	1 in 100	Melbourne	Intensity	All	NA	-8.89	-23.4					Not significant	Table 3	Change for 24 h. No range	Old study (second period dominated by millenium drought) and just one station
Yilmaz, A.G., Hossain, I., Perera, B.J.C.	Trend	1925-1966 vs 1967-2010	Stations		0.38	2, 3, 6 h	1 in 2	Melbourne	Intensity	All	Mean	5.15	13.6	4.44	11.7	5.63	14.8	Not significant	Table 3	Change and range for 2 h, 3 h, 6 h	Old study (second period dominated by millenium drought) and just one station
Yilmaz, A.G., Hossain, I., Perera, B.J.C.	Trend	1925-1966 vs 1967-2010	Stations		0.38	Hourly	1 in 2	Melbourne	Intensity	All	NA	5.79	15.2					Not significant	Table 3	Change and range for 1 h. No range	Old study (second period dominated by millenium drought) and just one station
Yilmaz, A.G., Hossain, I., Perera, B.J.C.	Trend	1925-1966 vs 1967-2010	Stations		0.38	6 min, 30 min	1 in 2	Melbourne	Intensity	All	Median	6.46	17	0.42	1.1	12.5	32.9	Not significant	Table 3	Change and range for 6 min, 30 min	Old study (second period dominated by millenium drought) and just one station
Yilmaz, A.G., Hossain, I., Perera, B.J.C.	Trend	1925-1966 vs 1967-2010	Stations		0.38	Daily	1 in 2	Melbourne	Intensity	All	NA	0	0					Not significant	Table 3	Change for 24 h. No range	Old study (second period dominated by millenium drought) and just one station
Yilmaz, A.G., Hossain, I., Perera, B.J.C.	Trend	1925-1966 vs 1967-2010	Stations		0.38	Hourly	1 in 20	Melbourne	Intensity	All	NA	-0.77	-2					Not significant	Table 3	Change and range for 1 h. No range	Old study (second period dominated by millenium drought) and just one station
Yilmaz, A.G., Hossain, I., Perera, B.J.C.	Trend	1925-1966 vs 1967-2010	Stations		0.38	2, 3, 6 h	1 in 20	Melbourne	Intensity	All	Mean	5.72	15.1	2.21	5.8	8.75	23	Not significant	Table 3	Change and range for 2 h, 3 h, 6 h	Old study (second period dominated by millenium drought) and just one station
Yilmaz, A.G., Hossain, I., Perera, B.J.C.	Trend	1925-1966 vs 1967-2010	Stations		0.38	6 min, 30 min	1 in 20	Melbourne	Intensity	All	Mean	4.44	11.7	-1.53	-4	10.41	27.4	Not significant	Table 3	Change and range for 6 min, 30 min	Old study (second period dominated by millenium drought) and just one station
Yilmaz, A.G., Hossain, I., Perera, B.J.C.	Trend	1925-1966 vs 1967-2010	Stations		0.38	Daily	1 in 20	Melbourne	Intensity	All	NA	-3.23	-8.5					Not significant	Table 3	Change for 24 h. No range	Old study (second period dominated by millenium drought) and just one station
Yilmaz, A.G., Hossain, I., Perera, B.J.C.	Trend	1925-1966 vs 1967-2010	Stations		0.38	2, 3, 6 h	1 in 5	Melbourne	Intensity	All	Mean	5.52	14.5	4.88	12.8	6.52	17.2	Not significant	Table 3	Change and range for 2 h, 3 h, 6 h	Old study (second period dominated by millenium drought) and just one station
Yilmaz, A.G., Hossain, I., Perera, B.J.C.	Trend	1925-1966 vs 1967-2010	Stations		0.38	Hourly	1 in 5	Melbourne	Intensity	All	NA	5.49	14.4					Not significant	Table 3	Change and range for 1 h. No range	Old study (second period dominated by millenium drought) and just one station
Yilmaz, A.G., Hossain, I., Perera, B.J.C.	Trend	1925-1966 vs 1967-2010	Stations		0.38	6 min, 30 min	1 in 5	Melbourne	Intensity	All	Mean	7.03	18.5	2.31	6.1	11.75	30.9	Not significant	Table 3	Change and range for 6 min, 30 min	Old study (second period dominated by millenium drought) and just one station
Yilmaz, A.G., Hossain, I., Perera, B.J.C.	Trend	1925-1966 vs 1967-2010	Stations		0.38	Daily	1 in 5	Melbourne	Intensity	All	NA	-4.55	-12					Not significant	Table 3	Change for 24 h. No range	Old study (second period dominated by millenium drought) and just one station
Yilmaz, A.G., Hossain, I., Perera, B.J.C.	Trend	1925-1966 vs 1967-2010	Stations		0.38	Hourly	1 in 50	Melbourne	Intensity	All	NA	-7.69	-20.2					Not significant	Table 3	Change and range for 1 h. No range	Old study (second period dominated by millenium drought) and just one station
Yilmaz, A.G., Hossain, I., Perera, B.J.C.	Trend	1925-1966 vs 1967-2010	Stations		0.38	2, 3, 6 h	1 in 50	Melbourne	Intensity	All	Mean	4.1	10.8	-1.3	-3.4	9.18	24.2	Not significant	Table 3	Change and range for 2 h, 3 h, 6 h	Old study (second period dominated by millenium drought) and just one station
Yilmaz, A.G., Hossain, I., Perera, B.J.C.	Trend	1925-1966 vs 1967-2010	Stations		0.38	6 min, 30 min	1 in 50	Melbourne	Intensity	All	Mean	2.49	6.6	-13.74	-36.1	18.73	49.3	Not significant	Table 3	Change and range for 6 min, 30 min	Old study (second period dominated by millenium drought) and just one station
Yilmaz, A.G., Hossain, I., Perera, B.J.C.	Trend	1925-1966 vs 1967-2010	Stations		0.38	Daily	1 in 50	Melbourne	Intensity	All	NA	-5.26	-13.9					Not significant	Table 3	Change for 24 h. No range	Old study (second period dominated by millenium drought) and just one station
Hajani E., Rahman A.	Trend	1945-2014	Stations		1	Daily	Rx1D	NSW	Intensity	All								At 5% confidence, 12/200 stations positive, 17/200 negative trends.	Fig 8	Magnitudes reported for 5 stations in Figure 8, but only for those with significant decreasing trends. Overall decreasing trend	Only significant decreasing trends are shown
Chen, Y.-R., Yu, B., Jenkins, G.	Trend	1931-1960 vs 1975-2004	Stations		0.7	6 h	Annual max	Hobart	Intensity	All	NA	-25	-35.7					p <= 0.10	Table 2		Single stations; using different sets of years for each station (mostly old), so feels a bit cherry-picking
Chen, Y.-R., Yu, B., Jenkins, G.	Trend	1931-1960 vs 1975-2004	Stations		0.7	3 h	Annual max	Hobart	Intensity	All	NA	-21	-30					p <= 0.09	Table 2		Single stations; using different sets of years for each station (mostly old), so feels a bit cherry-picking
Chen, Y.-R., Yu, B., Jenkins, G.	Trend	1931-1960 vs 1975-2004	Stations		0.7	2 h	Annual max	Hobart	Intensity	All	NA	-19	-27.1					p <= 0.07	Table 2		Single stations; using different sets of years for each station (mostly old), so feels a bit cherry-picking
Chen, Y.-R., Yu, B., Jenkins, G.	Trend	1921-1950 vs 1951-1980	Stations		0.4	Hourly	Annual max	Sydney	Intensity	All	NA	20	50					p <= 0.05	Table 2		Single stations; using different sets of years for each station (mostly old), so feels a bit cherry-picking
Chen, Y.-R., Yu, B., Jenkins, G.	Trend	1921-1950 vs 1951-1980	Stations		0.4	2 h	Annual max	Sydney	Intensity	All	NA	23	57.5					p <= 0.06	Table 2		Single stations; using different sets of years for each station (mostly old), so feels a bit cherry-picking
Chen, Y.-R., Yu, B., Jenkins, G.	Trend	1921-1950 vs 1951-1980	Stations		0.4	6 h	Annual max	Sydney	Intensity	All	NA	23	57.5					p <= 0.10	Table 2		Single stations; using different sets of years for each station (mostly old), so feels a bit cherry-picking
Chen, Y.-R., Yu, B., Jenkins, G.	Trend	1921-1950 vs 1951-1980	Stations		0.4	3 h	Annual max	Sydney	Intensity	All	NA	24	60					p <= 0.08	Table 2		Single stations; using different sets of years for each station (mostly old), so feels a bit cherry-picking
Chen, Y.-R., Yu, B., Jenkins, G.	Trend	1912-1941 vs 1947-1976	Stations		0.1	6 h	Annual max	Brisbane	Intensity	All	NA	23	230					p <= 0.10	Table 2		Single stations; using different sets of years for each station (mostly old), so feels a bit cherry-picking
Chen, Y.-R., Yu, B., Jenkins, G.	Trend	1946-1975 vs 1976-2005	Stations		0.6	6 min	Annual max	Rockhampton	Intensity	All	NA	15	25					p <= 0.05	Table 2		Single stations; using different sets of years for each station (mostly old), so feels a bit cherry-picking
Chen, Y.-R., Yu, B., Jenkins, G.	Trend	1946-1975 vs 1976-2005	Stations		0.7	6 min	Annual max	Melbourne	Intensity	All	NA	24	34.3					p <= 0.05	Table 2		Single stations; using different sets of years for each station (mostly old), so feels a bit cherry-picking
Chen, Y.-R., Yu, B., Jenkins, G.	Trend	1931-1960 vs 1975-2004	Stations		0.7	6 min	Annual max	Hobart	Intensity	All	NA	27	38.6					p <= 0.05	Table 2		Single stations; using different sets of years for each station (mostly old), so feels a bit cherry-picking
Chen, Y.-R., Yu, B., Jenkins, G.	Trend	1931-1960 vs 1975-2004	Stations		0.7	12 h	Annual max	Hobart	Intensity	All	NA	-26	-37.1					p <= 0.10	Table 2		Single stations; using different sets of years for each station (mostly old), so feels a bit cherry-picking
Chen, Y.-R., Yu, B., Jenkins, G.	Trend	1931-1960 vs 1975-2004	Stations		0.7	Daily	Annual max	Hobart	Intensity	All	NA	-22	-31.4					p <= 0.10	Table 2		Single stations; using different sets of years for each station (mostly old), so feels a bit cherry-picking
Chen, Y.-R., Yu, B., Jenkins, G.	Trend	1921-1950 vs 1951-1980	Stations		0.4	12 h	Annual max	Sydney	Intensity	All	NA	25	62.5					p <= 0.10	Table 2		Single stations; using different sets of years for each station (mostly old), so feels a bit cherry-picking
Chen, Y.-R., Yu, B., Jenkins, G.	Trend	1912-1941 vs 1947-1976	Stations		0.1	12 h	Annual max	Brisbane	Intensity	All	NA	31	310					p <= 0.10	Table 2		Single stations; using different sets of years for each station (mostly old), so feels a bit cherry-picking
Chen, Y.-R., Yu, B., Jenkins, G.	Trend	1912-1941 vs 1947-1976	Stations		0.1	Daily	Annual max	Brisbane	Intensity	All	NA	44	440					p <= 0.10	Table 2		Single stations; using different sets of years for each station (mostly old), so feels a bit cherry-picking
Visser, J.B., Kim, S., Wasko, C., Nathan, R., Sharma, A.	Trend	1960-2018	Stations			Daily	DP1D	Australia	Intensity	All								30% of stations significant at 5% level	Fig 4	Uses daily persisting dewpoint	Unclear how to translate change in dewpoint to change in PMP for stations.
Osburn, L., Hope, P., Dowdy, A.	Trend	1958-1985 vs 1987-2014	Stations		0.48	Hourly	20 most extreme events in period	Victoria	Intensity	Warm	Mean	7.05	14.6					Stat. significant increases in intensity for ARI2 events at 25% of stations.	Fig 5a, pg 5, Fig 8	Mean hourly rain rate estimated from Fig. 5 a which includes two more stations than reported change. Range of changes difficult to estimate from Fig 8	Warm season only
Guerreiro, S.B., Fowler, H.J., Barbero, R., Westra, S., Lenderink, G., Blenkinsop, S., Lewis, E., Li, X.-F.	Trend	1966â€“1989 vs 1990â€“2013	Stations		0.48	Hourly	~Rx1D (mean of 20 largest values)	Australia	Intensity	All	Mean	9.36	19.5	-31.2	-65	55.47	115.6	Well outside range of bootstrapping. Most stations have increase	Fig 1, Supp Fig 3	Range for 25% of stations
Guerreiro, S.B., Fowler, H.J., Barbero, R., Westra, S., Lenderink, G., Blenkinsop, S., Lewis, E., Li, X.-F.	Trend	1966â€“1989 vs 1990â€“2013	Stations		0.48	Daily	~Rx1D (mean of 20 largest values)	Australia	Intensity	All	Mean	3.37	7	-1.25	-2.6	7.24	15.1	Edge of range expected from bootstrapping. Many negative, esp on east coast	Fig 1, Supp Fig 3	Range for 25% of stations
Westra, S., Evans, J.P., Mehrotra, R., Sharma, A.	Scaling	1979-2006	Stations		1	Hourly	Annual max	Capital cities	Intensity	All	Mean	5.4	5.4	-4	-4	14.1	14.1	Only Canberra decreases	Table 6	Complex GAM based on converting daily to subdaily data with covariates based on temperature and other variables
Westra, S., Evans, J.P., Mehrotra, R., Sharma, A.	Scaling	1979-2006	Stations		1	6 min	Annual max	Capital cities	Intensity	All	Mean	8.8	8.8	-6.7	-6.7	22.3	22.3	Only Canberra decreases	Table 6	Complex GAM based on converting daily to subdaily data with covariates based on temperature and other variables
Wasko, C., Guo, D., Ho, M., Nathan, R., Vogel, E.	GCM	1976-2005 vs 2070-2099	NHP	RCP8.5	3.64	Daily	1 in 1.25	Median of Wet Tropics and Monsoonal North	Intensity	All		-6.46	-1.8	-25	-6.9	10	2.7		Data provided
Wasko, C., Guo, D., Ho, M., Nathan, R., Vogel, E.	GCM	1976-2005 vs 2070-2099	NHP	RCP8.5	3.64	Daily	1 in 1.25	East Coast cluster	Intensity	All		-0.45	-0.1	-15	-4.1	15	4.1		Data provided
Wasko, C., Guo, D., Ho, M., Nathan, R., Vogel, E.	GCM	1976-2005 vs 2070-2099	NHP	RCP8.5	3.64	Daily	1 in 1.25	Median of SS, SSWF, MB	Intensity	All		7.11	2	-5	-1.4	25	6.9		Data provided
Wasko, C., Guo, D., Ho, M., Nathan, R., Vogel, E.	GCM	1976-2005 vs 2070-2099	NHP	RCP8.5	3.64	Daily	1 in 10	East Coast cluster	Intensity	All		17.01	4.7	2	0.5	35	9.6	Excludes 0	Data provided
Wasko, C., Guo, D., Ho, M., Nathan, R., Vogel, E.	GCM	1976-2005 vs 2070-2099	NHP	RCP8.5	3.64	Daily	1 in 10	Median of SS, SSWF, MB	Intensity	All		17.47	4.8	-1	-0.3	35	9.6		Data provided
Wasko, C., Guo, D., Ho, M., Nathan, R., Vogel, E.	GCM	1976-2005 vs 2070-2099	NHP	RCP8.5	3.64	Daily	1 in 10	Median of Wet Tropics and Monsoonal North	Intensity	All		18.39	5.1	-5	-1.4	40	11		Data provided
Liu, J., Qiao, S., Li, C., Tang, S., Chen, D., Feng, G.	GCM	1960-2013	HadGEM3-A-N216	Historical vs natural	1	Daily	1 in 10	Asian-Australian monsoon region	Intensity	All	Mean	4.5	4.5	-20	-20	20	20		Pg 4-5, Fig 3	Hist stronger compared to the natural forcing world. Change is mean over whole monsoon area. Range is estimated for Northern Australia only. 15 member ensemble
Mantegna, G.A., White, C.J., Remenyi, T.A., Corney, S.P., Fox-Hughes, P.	RCM	1961-2009 vs 2070-2099	CMIP3-CCAM	2.9C increase	2.9	0.5 to 6 h	1 in 10	Hobart, Launceston	Intensity	All	Mean	50.13	17.3	40	13.8	66	22.8	Standard deviations given for each multi-model mean.	Table 4	Here showing mean of all multi-model means for 10% <= 6h AEPs
Mantegna, G.A., White, C.J., Remenyi, T.A., Corney, S.P., Fox-Hughes, P.	RCM	1961-2009 vs 2070-2099	CMIP3-CCAM	2.9C increase	2.9	Daily	1 in 10	Hobart, Launceston	Intensity	All	Mean	31.5	10.9	26	9	37	12.8	Standard deviations given for each multi-model mean.	Table 4	Here showing mean of all multi-model means for 10% AEPs, 24h
Wasko, C., Sharma, A.	Scaling	1914-2005	Stations	Range of temps	1	Hourly	1 in 10	Sydney, Brisbane	Intensity	All	Mean	11	11	10	10	12	12	Large uncertainty range	Pg 586	Range between two sites (Sydney and Brisbane)
Wasko, C., Sharma, A.	Scaling	1914-2005	Stations	Range of temps	1	Daily	1 in 10	Sydney, Brisbane	Intensity	All	Mean	4.5	4.5	4	4	5	5	Large uncertainty range	Pg 586	Range between two sites (Sydney and Brisbane)
Wasko, C., Nathan, R.	Trend	1950-2014	AGCD		0.14	Daily	1 in 10+	Australia (coasts)	Intensity	All	Mean	2.5	17.9	-8	-57.1	8	57.1	Standard deviation includes zero. 8% of stations have stat. significant positive trend, 4% have stat. sig. negative trend.	Pg 439, Fig 5a	Linear GMT trend 0.14C/decade in BEST, Mean ~2-3%/decade (page 439). Range is for peak rainfall across all stations (Figure 5a). Uses catchment averages. Various periods used
Mantegna, G.A., White, C.J., Remenyi, T.A., Corney, S.P., Fox-Hughes, P.	RCM	1961-2009 vs 2070-2099	CMIP3-CCAM	2.9C increase	2.9	Daily	1 in 100	Hobart, Launceston	Intensity	All	Mean	57.5	19.8	35	12.1	80	27.6	Standard deviations given for each multi-model mean.	Table 4	Here showing mean of all multi-model means for 1% AEPs, 24h
Wasko, C., Sharma, A.	Scaling	1914-2005	Stations	Range of temps	1	Hourly	1 in 100	Sydney, Brisbane	Intensity	All	Mean	18	18	18	18	18	18	Large uncertainty range	Pg 586	Range between two sites (Sydney and Brisbane)
Jayaweera, L., Wasko, C., Nathan, R., Johnson, F.	Trend	1967-2021	Stations		0.19	Hourly	1 in 100	Australia	Intensity	All	Median	3	15.5	-2	-10.3	7	36.2	1995-2021 vs 1967-1994 gives +15%/K	Fig 8	Nonstationary GEV location & scale
Jayaweera, L., Wasko, C., Nathan, R., Johnson, F.	Trend	1967-2021	Stations		0.19	6 min	1 in 100	Australia	Intensity	All	Median	8	41.3	0	0	21	108.5	1995-2021 vs 1967-1994 gives +37%/K	Fig 8	Nonstationary GEV location & scale
Jayaweera, L., Wasko, C., Nathan, R., Johnson, F.	Trend	1967-2021	Stations		0.19	Daily	1 in 100	Australia	Intensity	All	Median	-1	-5.2	-4	-20.7	4	20.7		Fig 8	Nonstationary GEV location & scale
Wasko, C., Guo, D., Ho, M., Nathan, R., Vogel, E.	GCM	1976-2005 vs 2070-2099	NHP	RCP8.5	3.64	Daily	1 in 2	Median of Wet Tropics and Monsoonal North	Intensity	All		-1.99	-0.5	-15	-4.1	20	5.5		Data provided
Wasko, C., Guo, D., Ho, M., Nathan, R., Vogel, E.	GCM	1976-2005 vs 2070-2099	NHP	RCP8.5	3.64	Daily	1 in 2	East Coast cluster	Intensity	All		5	1.4	-5	-1.4	15	4.1		Data provided
Wasko, C., Guo, D., Ho, M., Nathan, R., Vogel, E.	GCM	1976-2005 vs 2070-2099	NHP	RCP8.5	3.64	Daily	1 in 2	Median of SS, SSWF, MB	Intensity	All		9.97	2.7	-2	-0.5	25	6.9		Data provided
Liu, J., Qiao, S., Li, C., Tang, S., Chen, D., Feng, G.	GCM	1960-2013	HadGEM3-A-N216	Historical vs natural	1	Daily	1 in 2	Asian-Australian monsoon region	Intensity	All	Mean	0.7	0.7	-20	-20	20	20		Pg 4-5, Fig 3	Hist stronger compared to the natural forcing world. Change is mean over whole monsoon area. Range is estimated for Northern Australia only. 15 member ensemble
Wasko, C., Sharma, A.	Scaling	1914-2005	Stations	Range of temps	1	Hourly	1 in 2	Sydney, Brisbane	Intensity	All	Mean	7.5	7.5	6	6	9	9	Large uncertainty range	Pg 586	Range between two sites (Sydney and Brisbane)
Jayaweera, L., Wasko, C., Nathan, R., Johnson, F.	Trend	1967-2021	Stations		0.19	Hourly	1 in 2	Australia	Intensity	All	Median	2	10.3	0	0	5	25.8		Fig 8	Nonstationary GEV location & scale
Jayaweera, L., Wasko, C., Nathan, R., Johnson, F.	Trend	1967-2021	Stations		0.19	6 min	1 in 2	Australia	Intensity	All	Median	6	31	2	10.3	13	67.2		Fig 8	Nonstationary GEV location & scale
Jayaweera, L., Wasko, C., Nathan, R., Johnson, F.	Trend	1967-2021	Stations		0.19	Daily	1 in 2	Australia	Intensity	All	Median	0	0	-4	-20.7	5	25.8		Fig 8	Nonstationary GEV location & scale
Wasko, C., Guo, D., Ho, M., Nathan, R., Vogel, E.	GCM	1976-2005 vs 2070-2099	NHP	RCP8.5	3.64	Daily	1 in 20	East Coast cluster	Intensity	All		18.51	5.1	3	0.8	35	9.6	Excludes 0	Data provided
Wasko, C., Guo, D., Ho, M., Nathan, R., Vogel, E.	GCM	1976-2005 vs 2070-2099	NHP	RCP8.5	3.64	Daily	1 in 20	Median of SS, SSWF, MB	Intensity	All		19.65	5.4	-3	-0.8	40	11		Data provided
Wasko, C., Guo, D., Ho, M., Nathan, R., Vogel, E.	GCM	1976-2005 vs 2070-2099	NHP	RCP8.5	3.64	Daily	1 in 20	Median of Wet Tropics and Monsoonal North	Intensity	All		23.21	6.4	-1	-0.3	50	13.7		Data provided
Mantegna, G.A., White, C.J., Remenyi, T.A., Corney, S.P., Fox-Hughes, P.	RCM	1961-2009 vs 2070-2099	CMIP3-CCAM	2.9C increase	2.9	0.5 to 6 h	1 in 20	Hobart, Launceston	Intensity	All	Mean	58.88	20.3	45	15.5	79	27.2	Standard deviations given for each multi-model mean.	Table 4	Here showing mean of all multi-model means for 5% <= 6h AEPs
Mantegna, G.A., White, C.J., Remenyi, T.A., Corney, S.P., Fox-Hughes, P.	RCM	1961-2009 vs 2070-2099	CMIP3-CCAM	2.9C increase	2.9	Daily	1 in 20	Hobart, Launceston	Intensity	All	Mean	37.5	12.9	28	9.7	47	16.2	Standard deviations given for each multi-model mean.	Table 4	Here showing mean of all multi-model means for 5% AEPs, 24h
BoM and CSIRO	GCM	1986-2005 vs 2080-2099	21xCMIP5	RCP8.5	3.79	Daily	1 in 20	Eastern Australia	Intensity	All	Median	25	6.6	13	3.4	44	11.6		Fig 7.2.12	Ranges are 10-90th percentiles
BoM and CSIRO	GCM	1986-2005 vs 2080-2099	21xCMIP5	RCP8.5	3.79	Daily	1 in 20	Northern Australia	Intensity	All	Median	26	6.9	3	0.8	63	16.6		Fig 7.2.12	Ranges are 10-90th percentiles
BoM and CSIRO	GCM	1986-2005 vs 2080-2099	21xCMIP5	RCP8.5	3.79	Daily	1 in 20	Central Australia (rangelands)	Intensity	All	Median	22	5.8	9	2.4	41	10.8		Fig 7.2.12	Ranges are 10-90th percentiles
BoM and CSIRO	GCM	1986-2005 vs 2080-2099	21xCMIP5	RCP8.5	3.79	Daily	1 in 20	Southern Australia	Intensity	All	Median	25	6.6	6	1.6	30	7.9		Fig 7.2.12	Ranges are 10-90th percentiles
Jayaweera, L., Wasko, C., Nathan, R., Johnson, F.	Trend	1967-2021	Stations		0.19	Hourly	1 in 20	Australia	Intensity	All	Median	2	10.3	-2	-10.3	6	31	1995-2021 vs 1967-1994 gives +11%/K	Fig 8	Nonstationary GEV location & scale
Jayaweera, L., Wasko, C., Nathan, R., Johnson, F.	Trend	1967-2021	Stations		0.19	6 min	1 in 20	Australia	Intensity	All	Median	7	36.2	0	0	19	98.2	1995-2021 vs 1967-1994 gives +22%/K	Fig 8	Nonstationary GEV location & scale
Jayaweera, L., Wasko, C., Nathan, R., Johnson, F.	Trend	1967-2021	Stations		0.19	Daily	1 in 20	Australia	Intensity	All	Median	-1	-5.2	-5	-25.8	4	20.7		Fig 8	Nonstationary GEV location & scale
Smith, I., McAlpine, C.	GCM	1971-2000 vs 2071-2100	23xCMIP5	RCP8.5	3.8	Daily	1 in 27	SEQ	Intensity	All	Median	5.2	1.4					74% of models have increase	Table 1	No range
Wasko, C., Guo, D., Ho, M., Nathan, R., Vogel, E.	GCM	1976-2005 vs 2070-2099	NHP	RCP8.5	3.64	Daily	1 in 5	Median of Wet Tropics and Monsoonal North	Intensity	All		8.97	2.5	-10	-2.7	30	8.2		Data provided
Wasko, C., Guo, D., Ho, M., Nathan, R., Vogel, E.	GCM	1976-2005 vs 2070-2099	NHP	RCP8.5	3.64	Daily	1 in 5	East Coast cluster	Intensity	All		11.34	3.1	-2	-0.5	35	9.6		Data provided
Wasko, C., Guo, D., Ho, M., Nathan, R., Vogel, E.	GCM	1976-2005 vs 2070-2099	NHP	RCP8.5	3.64	Daily	1 in 5	Median of SS, SSWF, MB	Intensity	All		13.61	3.7	-1	-0.3	30	8.2		Data provided
Wasko, C., Guo, D., Ho, M., Nathan, R., Vogel, E.	GCM	1976-2005 vs 2070-2099	NHP	RCP8.5	3.64	Daily	1 in 50	East Coast cluster	Intensity	All		19.09	5.2	5	1.4	35	9.6	Excludes 0	Data provided
Wasko, C., Guo, D., Ho, M., Nathan, R., Vogel, E.	GCM	1976-2005 vs 2070-2099	NHP	RCP8.5	3.64	Daily	1 in 50	Median of SS, SSWF, MB	Intensity	All		20.27	5.6	-5	-1.4	45	12.4		Data provided
Wasko, C., Guo, D., Ho, M., Nathan, R., Vogel, E.	GCM	1976-2005 vs 2070-2099	NHP	RCP8.5	3.64	Daily	1 in 50	Median of Wet Tropics and Monsoonal North	Intensity	All		28.35	7.8	0	0	60	16.5		Data provided
Liu, J., Qiao, S., Li, C., Tang, S., Chen, D., Feng, G.	GCM	1960-2013	HadGEM3-A-N216	Historical vs natural	1	Daily	1 in 50	Asian-Australian monsoon region	Intensity	All	Mean	4.3	4.3	-16	-16	20	20		Pg 4-5, Fig 3	Hist stronger compared to the natural forcing world. Change is mean over whole monsoon area. Range is estimated for Northern Australia only. 15 member ensemble
Mantegna, G.A., White, C.J., Remenyi, T.A., Corney, S.P., Fox-Hughes, P.	RCM	1961-2009 vs 2070-2099	CMIP3-CCAM	2.9C increase	2.9	0.5 to 6 h	1 in 50	Hobart, Launceston	Intensity	All	Mean	73.88	25.5	51	17.6	101	34.8	Standard deviations given for each multi-model mean.	Table 4	Here showing mean of all multi-model means for 2% <= 6h AEPs
Mantegna, G.A., White, C.J., Remenyi, T.A., Corney, S.P., Fox-Hughes, P.	RCM	1961-2009 vs 2070-2099	CMIP3-CCAM	2.9C increase	2.9	Daily	1 in 50	Hobart, Launceston	Intensity	All	Mean	47.5	16.4	31	10.7	64	22.1	Standard deviations given for each multi-model mean.	Table 4	Here showing mean of all multi-model means for 2% AEPs, 24h
Bao, J., Sherwood, S.C., Alexander, L.V., Evans, J.P.	RCM	1990-2009 vs 2060-2079	NARCliM	SRES A2	1	Daily	1 in rage > P99.9 (~ARI3)	Australia	Intensity	All	Mean	9.2	9.2	5.7	5.7	15	15		Supp Table 2
Evans, J.P., McCabe, M.F.	RCM	1985-2009 vs 2075-2099	CSIROMk3-WRF			Daily	P99TOT	SEA (3 subregions)	Total	All		-2 to +35%		-2		35				50km & 10km resolutions
Visser, J.B., Kim, S., Wasko, C., Nathan, R., Sharma, A.	GCM	1950-2014 -> 2100	CMIP6, ACCESS-CM2	SSP5-8.5	3.7	Daily	PMP	Australia	Intensity	All	Mean	33	8.9	12	3.2	55	14.9		Pg 14	Change is on PMP. Uses daily persisting dewpoint
Visser, J.B., Kim, S., Wasko, C., Nathan, R., Sharma, A.	GCM	1950-2014 -> 2100	CMIP6, ACCESS-CM2	SSP1-2.6	1.3	Daily	PMP	Australia	Intensity	All	Mean	13	10	4	3.1	29	22.3		Pg 14	Change is on PMP. Uses daily persisting dewpoint
Ju, J., Wu, C., Yeh, P.J.-F., Dai, H., Hu, B.X.	GCM	2C vs 1976-2005	CESM-LWR	2C in RCP8.5	1.13	Daily	Rx1D	Australia	Intensity	All	Median	11	9.7	9.5	8.4	12	10.6		Fig 9
Ju, J., Wu, C., Yeh, P.J.-F., Dai, H., Hu, B.X.	GCM	1.5C vs 1976-2005	CESM-LWR	1.5C in RCP8.5	0.63	Daily	Rx1D	Australia	Intensity	All	Median	8	12.7	4	6.3	11	17.5		Fig 9
Pfahl, S., O'Gorman, P.A., Fischer, E.M.	Scaling	1950-2100	CMIP5		1	Daily	Rx1D	Australia	Intensity	All	Mean	4.5	4.5	-1	-1	6	6	Robust in north and south with changes from 3-6 %/K.	Fig 2	Changes and range estimated from Fig 2
White, C.J., et al.	RCM	1961-1990 vs 2070-2099	6xCMIP3 CCAM	A2	3.9	Daily	Rx1D	Tasmania	Intensity	All		15	3.8	9	2.3	45	11.5	All models have linear increases 2010-2099; not all significant. +8mm; spatial map has increases mostly +9 to +27%	Pg 3161, Fig 7
Alexander, L.V., Arblaster, J.M.	GCM	1986-2005 vs 2081-2100	23xCMIP5	RCP8.5, RCP4.5	3.84	Daily	Rx1D	Australia	Intensity	All		11.4	3	4	1	30	7.8	Lower confidence due to model biases; +5.7mm, mean is ~50mm
Alexander, L.V., Arblaster, J.M.	Trend	1911-2010	AWAP		0.09	Daily	Rx1D	Australia	Intensity	All	Mean	0.86	9.1	0.24	2.5	1.48	15.7	Downgraded to low res & masking to HadEx2, superceded by more modern assessments. mean trend/decade between AWAP and HadEX2.	Table 5
BoM and CSIRO	GCM	1986-2005 vs 2080-2099	21xCMIP5	RCP8.5	3.79	Daily	Rx1D	Eastern Australia	Intensity	All	Median	13	3.4	2	0.5	28	7.4		Fig 7.2.12	Ranges are 10-90th percentiles
BoM and CSIRO	GCM	1986-2005 vs 2080-2099	21xCMIP5	RCP8.5	3.79	Daily	Rx1D	Northern Australia	Intensity	All	Median	19	5	-1	-0.3	47	12.4		Fig 7.2.12	Ranges are 10-90th percentiles
BoM and CSIRO	GCM	1986-2005 vs 2080-2099	21xCMIP5	RCP8.5	3.79	Daily	Rx1D	Central Australia (rangelands)	Intensity	All	Median	14	3.7	3	0.8	28	7.4		Fig 7.2.12	Ranges are 10-90th percentiles
BoM and CSIRO	GCM	1986-2005 vs 2080-2099	21xCMIP5	RCP8.5	3.79	Daily	Rx1D	Southern Australia	Intensity	All	Median	17	4.5	1	0.3	22	5.8		Fig 7.2.12	Ranges are 10-90th percentiles
Zheng, F., Westra, S., Leonard, M.	Trend	1966-2012	Stations		0.18	1, 2, 3, 6 h	Rx1D	Greater Sydney	Intensity	All	Mean	0.75	4.2	-1	-5.6	3	16.7	Not significant, strongest in summer	Fig 1	Warming 0.18 degrees/decade
Zheng, F., Westra, S., Leonard, M.	Trend	1966-2012	Stations		0.18	5, 10, 15, 30 min	Rx1D	Greater Sydney	Intensity	All	Mean	6.88	38.2	5	27.8	8	44.4	Significant, strongest in summer	Fig 1	Warming 0.18 degrees/decade
Zheng, F., Westra, S., Leonard, M.	Trend	1966-2012	Stations		0.18	12, 24 h	Rx1D	Greater Sydney	Intensity	All	Mean	-3.5	-19.4	-4	-22.2	-3	-16.7	Not significant; significant increase in summer (9-15%/decade)	Fig 1	Warming 0.18 degrees/decade
Gutierrez, J.M., et al.	GCM	1850-1900 vs GWL3	CMIP6	SSP3-70	3	Daily	Rx1D	Central Australia	Intensity	All	Median	8.8	2.9	-3.3	-1.1	19.9	6.6		Table summary	Range is 5-95th percentile
Gutierrez, J.M., et al.	GCM	1850-1900 vs GWL3	CMIP6	SSP3-70	3	Daily	Rx1D	Eastern Australia	Intensity	All	Median	9.8	3.3	0.7	0.2	24.6	8.2		Table summary	Range is 5-95th percentile
Gutierrez, J.M., et al.	GCM	1850-1900 vs GWL3	CMIP6	SSP3-70	3	Daily	Rx1D	Southern Australia	Intensity	All	Median	10.6	3.5	4	1.3	17.9	6		Table summary	Range is 5-95th percentile
Gutierrez, J.M., et al.	GCM	1850-1900 vs GWL3	CMIP6	SSP3-70	3	Daily	Rx1D	Northern Australia	Intensity	All	Median	10.8	3.6	0.2	0.1	18.7	6.2		Table summary	Range is 5-95th percentile
Jayaweera, L., Wasko, C., Nathan, R., Johnson, F.	Trend	1967-2021	Stations		0.19	Hourly	Rx1D	Australia	Intensity	All	Median	2	10.3	-5	-25.8	11	56.8	~70% have increase, 10% sig	Fig 8
Jayaweera, L., Wasko, C., Nathan, R., Johnson, F.	Trend	1967-2021	Stations		0.19	6 min	Rx1D	Australia	Intensity	All	Median	6	31	2	10.3	13	67.2	>90% have increase, 40% sig	Fig 8
Jayaweera, L., Wasko, C., Nathan, R., Johnson, F.	Trend	1967-2021	Stations		0.2	Daily	Rx1D	Australia	Intensity	All	Median	-1	-5	-5	-25	10	50	~0	Fig 8
Dey, R., Gallant, A.J.E., Lewis, S.C.	Trend	1911-2016	AGCD		1.05	Daily	Rx1D (duration 1-2 day events)	Northwest	Intensity	All	Trend on mean	13.22	12.6	-11.67	-11.1	11.67	11.1	Significant for multiple endpoints & regions.	Fig 15, Fig 11	1-2 day events only; no trend in longer events. Significant for multiple endpoints & regions. Converted based on 0.1C/decade trend in BEST & estimated mean mm in Fig. 15. Min/max trends are per pixel min/max over regions in Fig. 11 (per pixel trends are weaker than trends on spatial mean)
Dey, R., Gallant, A.J.E., Lewis, S.C.	Trend	1911-2016	AGCD		1.05	Daily	Rx1D (duration 1-2 day events)	Southwest WA	Intensity	All	Trend on mean	28.35	27	2.63	2.5	7.88	7.5	Significant for multiple endpoints & regions.	Fig 15, Fig 11	1-2 day events only; no trend in longer events. Significant for multiple endpoints & regions. Converted based on 0.1C/decade trend in BEST & estimated mean mm in Fig. 15. Min/max trends are per pixel min/max over regions in Fig. 11 (per pixel trends are weaker than trends on spatial mean)
Dey, R., Gallant, A.J.E., Lewis, S.C.	Trend	1911-2016	AGCD		1.05	Daily	Rx1D (duration 1-2 day events)	Southeast	Intensity	All	Trend on mean	30.5	29	0	0	10	9.5	Significant for multiple endpoints & regions.	Fig 15, Fig 11	1-2 day events only; no trend in longer events. Significant for multiple endpoints & regions. Converted based on 0.1C/decade trend in BEST & estimated mean mm in Fig. 15. Min/max trends are per pixel min/max over regions in Fig. 11 (per pixel trends are weaker than trends on spatial mean)
Ju, J., Wu, C., Yeh, P.J.-F., Dai, H., Hu, B.X.	GCM	2C vs 1976-2005	CESM-LWR	2C in RCP8.5	1.13	Multiday	Rx5D	Australia	Intensity	All	Median	8	7.1	7	6.2	10	8.8		Fig 9
Ju, J., Wu, C., Yeh, P.J.-F., Dai, H., Hu, B.X.	GCM	1.5C vs 1976-2005	CESM-LWR	1.5C in RCP8.5	0.63	Multiday	Rx5D	Australia	Intensity	All	Median	5	7.9	1	1.6	8	12.7		Fig 9
Sillmann, J., Kharin, V.V., Zwiers, F.W., Zhang, X., Bronaugh, D.	GCM	1981-2000 vs 2081-2100	19xCMIP5	RCP8.5	3.91	Multiday	Rx5D	Australia	Intensity	All		10	2.6	-30	-7.7	30	7.7			Also reports other RCPs, weaker results
